# Supplementary material
Source: PubMed Central journal article supplement (PMC5193100)
Supplement: NIHMS836704-supplement-Supplemental_Materials.pdf [file NIHMS836704-supplement-Supplemental_Materials.pdf]

## **Supplemental Methods: Functional Connectivity Analysis of Experiment 1 Data**

Functional connectivity analyses were performed on data acquired while participants were at “rest.” Specifically, participants were instructed to maintain fixation but otherwise let their minds wander. Data analysis consisted of the following steps: (1) a field map, collected in the same dimensions as the resting-state functional data, was used for B-field un-warping as carried out in the FSL program FUGUE; (2) data were motion-corrected as described for the task-based time series above, and (3) band-pass filtered between 0.01 and 0.1 Hz, smoothed using a 6 mm FWHM Gaussian kernel. A residual time series was then created by sequentially regressing out effects due to the six motion parameters, signal from the ventricles, signal from white matter, and global signal. This residualized time series was tested at every voxel for correlation with the seed region in the bilateral posterior cingulate gyrus, as defined in the Talairach atlas (file TT\_N27\_EZ\_ML) included in the AFNI software (Lancaster et al., 2000). Maps of individual participant results were then transformed to atlas space for group-level statistical testing, as described in the Methods section for the main experiments.

### **References**

Lancaster, J. L., Woldorff, M. G., Parsons, L. M., Liotti, M., Freitas, C. S., Rainey, L., et al. (2000). Automated Talairach atlas labels for functional brain mapping. *Human Brain Mapping, 10*, 120-131.

Supplemental Figure 1:

### Resting State

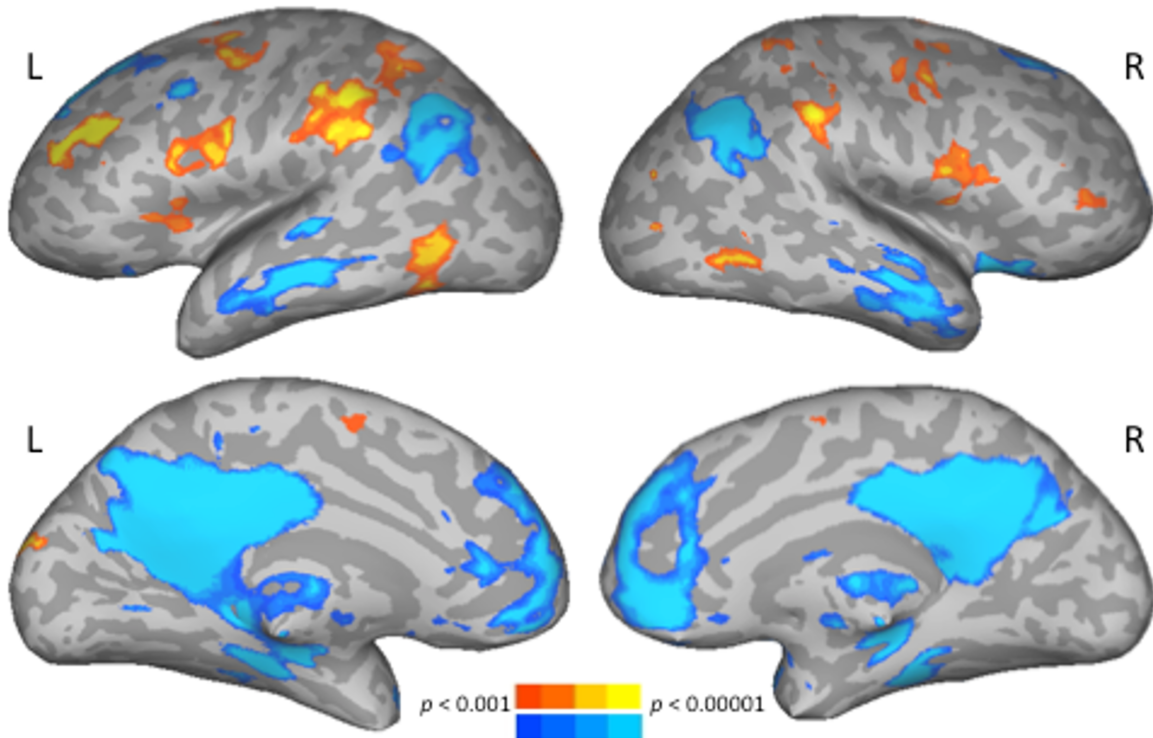

Supplemental Figure 1: Results of resting state functional connectivity analysis using a bilateral posterior cingulate seed.

Supplemental Figure 2:

### Exp 2: High – Low Imageability Words

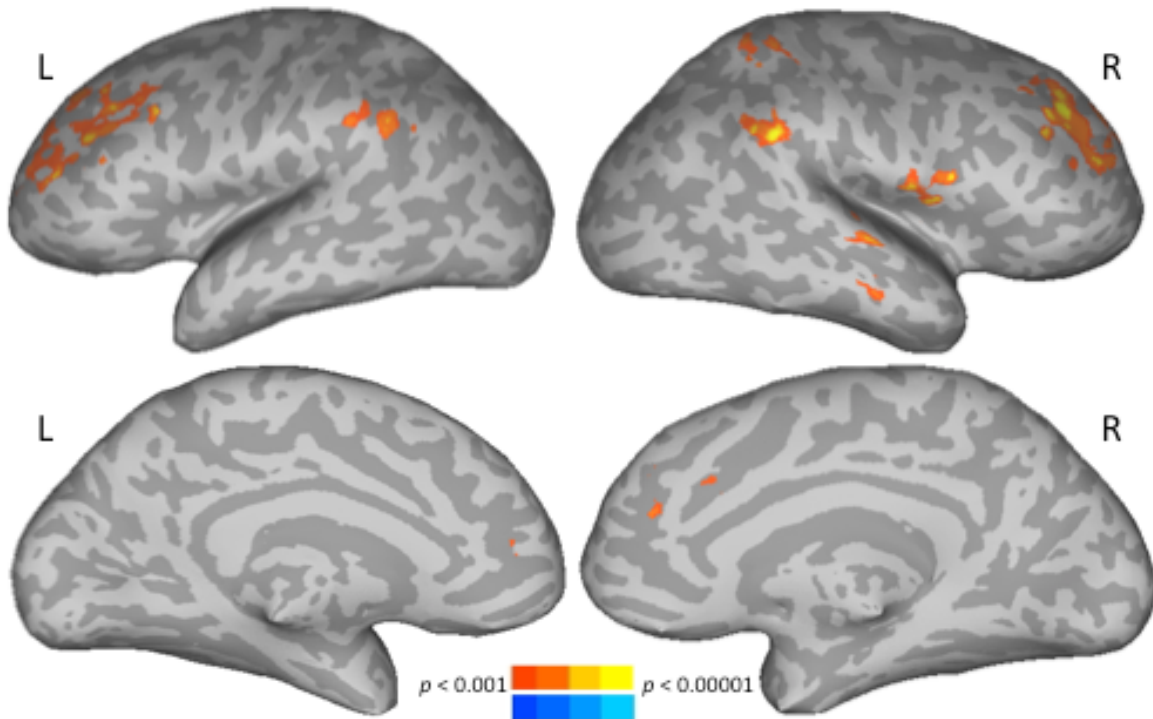

Supplemental Figure 2: Experiment 2, results from the contrast of high minus low imageability words.

Supplemental Figure 3:

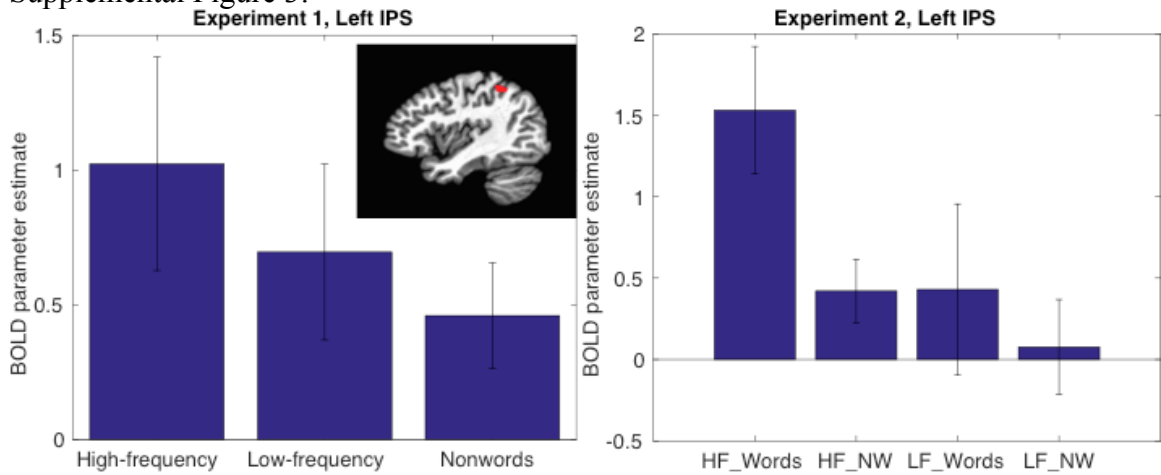

Supplemental Figure 3: Interaction graphs from left IPS in Experiments 1 and 2. The same mask (pictured in inset) is used for both plots. The interaction in this area is only significant for Experiment 2.

Supplemental Tables

Table S1. Experiment 1 fMRI contrasts (coordinates of maximum intensity)

| Location of extreme point             | Cluster size ( $\mu$ l) | X   | Y   | Z   | z-score |
|---------------------------------------|-------------------------|-----|-----|-----|---------|
| <b>Words &gt; Nonwords</b>            |                         |     |     |     |         |
| Bilateral frontal and subcortical     | 31576                   |     |     |     |         |
| L Inferior frontal gyrus              |                         | -46 | 6   | 20  | 4.44    |
| L Caudate                             |                         | -12 | -12 | 24  | 4.11    |
| R Caudate                             |                         | 19  | 7   | 20  | 3.93    |
| L Middle frontal gyrus                |                         | -48 | 34  | 19  | 3.65    |
| Cerebellum (medial and right lateral) | 21979                   |     |     |     |         |
| R Postero-medial cerebellum           |                         | 5   | -73 | -25 | 4.91    |
| R Lateral cerebellum                  |                         | 27  | -60 | -24 | 4.44    |
| R Medial cerebellum                   |                         | 5   | -44 | -23 | 3.54    |
| L Occipito-cerebellar                 | 7461                    |     |     |     |         |
| L Lateral cerebellum                  |                         | -28 | -59 | -24 | 4.20    |
| L Lateral occipital                   |                         | -45 | -77 | -14 | 3.70    |
| L Occipital                           | 3121                    |     |     |     |         |
|                                       |                         | -22 | -95 | -3  | 3.78    |
| R Medial Occipital                    | 2714                    | 29  | -59 | 5   | 4.20    |
| L Supplementary Motor Area            | 2316                    | -3  | 1   | 52  | 3.60    |

|                                         |        |     |     |     |      |
|-----------------------------------------|--------|-----|-----|-----|------|
| R Occipital Pole                        | 1894   | 25  | -99 | -5  | 3.38 |
| <b>Nonwords &gt; Words</b>              |        |     |     |     |      |
| Bilateral parieto-temporal              | 114974 |     |     |     |      |
| R precuneus                             |        | 9   | -63 | 23  | 5.63 |
| L parahippocampal gyrus                 |        | -20 | -51 | -7  | 4.66 |
| R angular gyrus                         |        | 38  | -75 | 24  | 4.06 |
| R parahippocampal gyrus                 |        | 24  | -49 | -6  | 4.03 |
| R middle temporal gyrus                 |        | 45  | -52 | 16  | 3.89 |
| R posterior cingulate gyrus             |        | 4   | -27 | 38  | 3.85 |
| R precuneus                             |        | 4   | -56 | 65  | 3.84 |
| R middle temporal gyrus                 |        | 57  | -52 | -6  | 3.01 |
| Medial prefrontal and anterior temporal | 46252  |     |     |     |      |
| L anterior cingulate gyrus              |        | -13 | 41  | 9   | 5.19 |
| R anterior cingulate                    |        | 15  | 41  | 7   | 5.03 |
| R anterior superior temporal            |        | 59  | 8   | -10 | 4.47 |
| R middle frontal gyrus                  |        | 24  | 25  | 35  | 4.46 |
| R medial temporal pole                  |        | 22  | 11  | -32 | 3.59 |
| L middle frontal                        | 7870   |     |     |     |      |
| L middle frontal gyrus                  |        | -29 | 22  | 51  | 4.21 |
| L anterior superior temporal gyrus      | 5785   | -49 | 4   | -15 | 3.84 |
| Peri-Rolandic                           | 4810   |     |     |     |      |
| R postcentral gyrus                     |        | 37  | -28 | 34  | 3.79 |

|                                      |       |     |     |     |      |
|--------------------------------------|-------|-----|-----|-----|------|
| R precentral gyrus                   |       | 48  | -16 | 55  | 3.45 |
| L posterior middle temporal gyrus    | 3049  | -56 | -56 | 17  | 3.61 |
| L supramarginal gyrus                | 1062  | -59 | -38 | 34  | 3.71 |
| L lateral cerebellum                 | 980   | -44 | -39 | -37 | 4.02 |
| <b>High &gt; Low Frequency Words</b> |       |     |     |     |      |
| Bilateral temporo-parietal           | 67209 |     |     |     |      |
| R precuneus                          |       | 10  | -62 | 36  | 5.34 |
| R supramarginal gyrus                |       | 54  | -40 | 26  | 4.09 |
| R angular gyrus                      |       | 42  | -75 | 20  | 3.82 |
| R inferior frontal gyrus             |       | 44  | 10  | 11  | 3.74 |
| R inferior temporal gyrus            |       | 57  | -33 | -17 | 3.69 |
| L mid-cingulate gyrus                |       | -11 | -6  | 46  | 3.35 |
| R intraparietal sulcus               |       | 29  | -42 | 40  | 3.35 |
| R posterior insula                   |       | 35  | -16 | 0   | 3.12 |
| L precuneus                          |       | -6  | -82 | 35  | 3.07 |
| R prefrontal                         | 13494 |     |     |     |      |
| R middle frontal gyrus               |       | 33  | 29  | 31  | 4.84 |
| R superior frontal gyrus             |       | 17  | 55  | 36  | 3.80 |
| R precentral sulcus                  |       | 40  | -3  | 43  | 3.63 |
| L temporo-parietal                   | 6113  |     |     |     |      |
| L supramarginal gyrus                |       | -59 | -39 | 40  | 4.03 |
| L posterior superior temporal gyrus  |       | -58 | -58 | 19  | 3.21 |
| R anterior temporal lobe             | 3925  |     |     |     |      |

|                                         |       |     |     |     |      |
|-----------------------------------------|-------|-----|-----|-----|------|
| R medial temporal pole                  |       | 27  | 21  | -26 | 3.50 |
| R anterior middle temporal gyrus        |       | 51  | 10  | -17 | 3.33 |
| L middle frontal gyrus                  | 3055  | -35 | 27  | 42  | 4.45 |
| R anterior cingulate cortex             | 2234  | 4   | 44  | 8   | 3.72 |
| L anterior middle temporal gyrus        | 1096  | -54 | 2   | -23 | 3.29 |
| R inferior frontal gyrus                | 909   | 44  | 37  | 5   | 3.72 |
| <b>Low &gt; High Frequency Words</b>    |       |     |     |     |      |
| L inferior frontal gyrus                | 7142  | -45 | 19  | 28  | 4.37 |
| R mid-cingulate gyrus                   | 1484  | 4   | -7  | 23  | 4.11 |
| R medial cerebellum                     | 1244  | 9   | -71 | -26 | 4.04 |
| <b>High &gt; Low Imageability Words</b> |       |     |     |     |      |
| Bilateral parieto-occipital             | 18044 |     |     |     |      |
| L precuneus                             |       | -2  | -61 | 54  | 4.93 |
| R lingual gyrus                         |       | 7   | -54 | 4   | 4.68 |
| L cuneus                                |       | -1  | -73 | 22  | 2.94 |
| L parahippocampal gyrus                 | 1104  | -30 | -28 | -18 | 3.21 |
| R middle frontal gyrus                  | 1086  | 31  | 23  | 43  | 3.91 |
| L cerebellum                            | 1040  | -31 | -72 | -20 | 3.59 |
| <b>Low &gt; High Imageability Words</b> |       |     |     |     |      |
| L inferior frontal gyrus                | 1098  | -39 | 37  | -2  | 3.62 |



Table S2. Experiment 1 functional connectivity of posterior cingulate (coordinates of maximum intensity)

| Location of extreme point            | Cluster size ( $\mu$ l) | X   | Y   | Z  | z-score |
|--------------------------------------|-------------------------|-----|-----|----|---------|
| <b>Areas anti-correlated with PC</b> |                         |     |     |    |         |
| L lateral parietal                   | 10299                   |     |     |    |         |
| L supramarginal gyrus                |                         | -51 | -32 | 43 | 4.79    |
| L intraparietal sulcus               |                         | -31 | -50 | 49 | 3.99    |
| R lateral frontal                    | 6601                    |     |     |    |         |
| R precentral gyrus                   |                         | 43  | -7  | 48 | 4.02    |
| R IFG pars opercularis               |                         | 43  | 2   | 10 | 3.99    |
| R superior frontal gyrus             |                         | 22  | -5  | 51 | 3.88    |
| L precentral gyrus                   | 4971                    | -60 | 3   | 31 | 4.51    |
| L middle frontal gyrus               | 2834                    | -35 | 35  | 34 | 5.37    |
| R supramarginal gyrus                | 2305                    | 55  | -30 | 37 | 4.44    |
| L posterior middle temporal gyrus    | 2108                    | -44 | -55 | -1 | 4.07    |
| L precentral sulcus                  | 2058                    | -22 | -7  | 51 | 4.14    |
| L cuneus                             | 1415                    | -12 | -89 | 21 | 4.32    |
| R posterior inferior temporal gyrus  | 1096                    | 43  | -54 | -6 | 4.02    |
| R middle frontal gyrus               | 910                     | 50  | 43  | 12 | 3.74    |
| L insula                             | 840                     | -32 | 16  | 11 | 3.79    |
| R intraparietal sulcus               | 638                     | 28  | -45 | 48 | 3.75    |

| Location of extreme point        | Cluster size ( $\mu$ l) | X   | Y   | Z   | z-score |
|----------------------------------|-------------------------|-----|-----|-----|---------|
| R lateral occipital cortex       | 471                     | 44  | -85 | 9   | 4.15    |
| R supplementary motor area       | 378                     | 1   | -5  | 55  | 3.56    |
| <b>Areas correlated with PC</b>  |                         |     |     |     |         |
| Parieto-temporal and subcortical | 77919                   |     |     |     |         |
| Bilateral posterior cingulate    |                         | 0   | -41 | 19  | 6.78    |
| R posterior cingulate            |                         | 17  | -46 | 29  | 5.86    |
| L parahippocampal gyrus          |                         | -23 | -25 | -10 | 5.61    |
| R thalamus                       |                         | 17  | -17 | -1  | 5.31    |
| R angular gyrus                  |                         | 45  | -62 | 34  | 5.25    |
| R parahippocampal gyrus          |                         | 25  | -27 | -22 | 5.18    |
| R midbrain                       |                         | 3   | -25 | -21 | 4.86    |
| R insula                         |                         | 29  | 13  | -11 | 4.68    |
| R thalamus                       |                         | 2   | -10 | 11  | 4.28    |
| Bilateral frontal                | 36281                   |     |     |     |         |
| R medial superior frontal gyrus  |                         | 3   | 47  | -2  | 5.04    |
| L superior frontal gyrus         |                         | -18 | 37  | 39  | 4.67    |
| R medial superior frontal gyrus  |                         | 2   | 48  | 35  | 4.58    |
| R superior frontal gyrus         |                         | 18  | 30  | 45  | 4.54    |
| L middle frontal gyrus           |                         | -31 | 9   | 43  | 4.41    |
| R superior frontal gyrus         |                         | 20  | 56  | 14  | 4.07    |
| L angular gyrus                  | 10188                   | -42 | -60 | 40  | 5.78    |

| Location of extreme point        | Cluster size ( $\mu$ l) | X   | Y   | Z   | z-score |
|----------------------------------|-------------------------|-----|-----|-----|---------|
| R middle temporal gyrus          | 6219                    |     |     |     |         |
| R middle temporal gyrus          |                         | 56  | -9  | -13 | 4.96    |
| R anterior middle temporal gyrus |                         | 41  | 1   | -24 | 3.94    |
| R middle temporal gyrus          |                         | 61  | -32 | -7  | 3.68    |
| L middle temporal gyrus          | 5575                    | -62 | -18 | -6  | 5.43    |
| L medial cerebellum              | 2331                    | -11 | -48 | -29 | 4.52    |
| L IFG, pars orbitalis            | 1184                    | -29 | 23  | -17 | 4.32    |
| R subgenual cingulate            | 519                     | 3   | 17  | -10 | 3.57    |

Table S3. Experiment 2 fMRI results (coordinates of maximum intensity)

| Location of extreme point          | Cluster size ( $\mu$ l) | X   | Y   | Z   | z-score |
|------------------------------------|-------------------------|-----|-----|-----|---------|
| <b>Words &gt; Nonwords</b>         |                         |     |     |     |         |
| L occipito-temporal                | 14074                   |     |     |     |         |
| L lateral occipital                |                         | -39 | -77 | -10 | 4.36    |
| L inferior temporal                |                         | -43 | -52 | -23 | 4.15    |
| L middle temporal gyrus            |                         | -46 | -29 | -10 | 3.34    |
| R occipito-temporal and cerebellar | 9462                    |     |     |     |         |
| R lateral occipital                |                         | 34  | -84 | -3  | 3.80    |
| R fusiform gyrus                   |                         | 44  | -59 | -19 | 3.78    |
| Bilateral supplementary motor area | 5268                    | -10 | 7   | 45  | 4.56    |
| Bilateral cerebellum and brainstem | 4501                    |     |     |     |         |
| L brainstem                        |                         | -4  | -36 | -37 | 4.94    |
| L medial cerebellum                |                         | -8  | -64 | -19 | 4.12    |
| R medial cerebellum                |                         | 11  | -66 | -36 | 4.12    |
| R caudate                          | 4262                    | 5   | 15  | 5   | 4.48    |
| L caudate                          | 1961                    | -6  | 8   | 7   | 4.41    |
| L anterior insula                  | 1732                    | -32 | 15  | 13  | 3.50    |
| <b>Nonwords &gt; Words</b>         |                         |     |     |     |         |
| Bilateral posterior cortices       | 64417                   |     |     |     |         |
| R posterior cingulate gyrus        |                         | 7   | -48 | 29  | 5.05    |

| Location of extreme point          | Cluster size ( $\mu$ l) | X   | Y   | Z   | z-score |
|------------------------------------|-------------------------|-----|-----|-----|---------|
| L angular gyrus                    |                         | -48 | -63 | 23  | 4.96    |
| R mid-cingulate gyrus              |                         | 6   | -6  | 37  | 4.47    |
| L parahippocampal gyrus            |                         | -25 | -37 | -5  | 4.39    |
| R precuneus                        |                         | -6  | -50 | 51  | 4.26    |
| L precuneus                        |                         | -16 | -73 | 36  | 4.18    |
| R cuneus                           |                         | 19  | -80 | 20  | 4.06    |
| R posterior insula                 |                         | 34  | -29 | 15  | 3.86    |
| L lingual gyrus                    |                         | -24 | -67 | -3  | 3.35    |
| R temporal lobe                    | 17614                   |     |     |     |         |
| R hippocampus                      |                         | 34  | -25 | -12 | 4.81    |
| R middle temporal gyrus            |                         | 58  | -10 | -14 | 4.76    |
| R amygdala                         |                         | 30  | 6   | -13 | 4.05    |
| Bilateral medial frontal           | 14673                   |     |     |     |         |
| L anterior cingulate gyrus         |                         | -8  | 40  | 2   | 4.53    |
| R frontal pole                     |                         | 4   | 64  | 7   | 4.14    |
| L medial superior frontal gyrus    |                         | -11 | 57  | 27  | 2.88    |
| R angular gyrus                    | 5100                    | 38  | -57 | 22  | 3.71    |
| L anterior superior temporal gyrus | 3491                    | -45 | 4   | -16 | 4.42    |
| L superior temporal gyrus          | 2178                    | -67 | -25 | 6   | 3.83    |
| L hippocampal                      | 2079                    |     |     |     |         |
| L parahippocampal gyrus            |                         | -16 | -18 | -23 | 4.42    |

| Location of extreme point            | Cluster size ( $\mu$ l) | X   | Y   | Z   | z-score |
|--------------------------------------|-------------------------|-----|-----|-----|---------|
| L hippocampus                        |                         | -24 | -12 | -13 | 4.17    |
| L mid-cingulate gyrus                | 1113                    | -13 | -20 | 37  | 4.21    |
| L middle frontal                     | 805                     |     |     |     |         |
| L middle frontal gyrus               |                         | -28 | 25  | 35  | 4.11    |
| L middle frontal gyrus               |                         | -27 | 20  | 42  | 3.18    |
| <b>High &gt; Low Frequency Words</b> |                         |     |     |     |         |
| Bilateral posterior cortices         | 28994                   |     |     |     |         |
| L cuneus                             |                         | -16 | -91 | 18  | 4.67    |
| L lingual gyrus                      |                         | -10 | -68 | -3  | 4.59    |
| R cuneus                             |                         | 18  | -73 | 17  | 3.99    |
| L intraparietal sulcus               |                         | -33 | -51 | 50  | 3.97    |
| R medial cerebellum                  |                         | 14  | -64 | -17 | 3.95    |
| L supramarginal gyrus                |                         | -59 | -45 | 28  | 3.95    |
| L postcentral gyrus                  |                         | -47 | -26 | 43  | 3.50    |
| R fronto-parietal                    | 10127                   |     |     |     |         |
| R precentral gyrus                   |                         | 48  | -14 | 52  | 3.96    |
| R intraparietal sulcus               |                         | 29  | -49 | 52  | 3.87    |
| R fronto-temporo-insular             | 7181                    |     |     |     |         |
| R superior temporal gyrus            |                         | 54  | -38 | 17  | 4.04    |
| R insula                             |                         | 44  | 3   | 8   | 3.50    |
| R precentral gyrus                   |                         | 56  | 5   | 37  | 3.15    |

| Location of extreme point               | Cluster size ( $\mu$ l) | X   | Y   | Z   | z-score |
|-----------------------------------------|-------------------------|-----|-----|-----|---------|
| L dorso-lateral prefrontal              | 5245                    |     |     |     |         |
| L middle frontal gyrus                  |                         | -33 | 32  | 35  | 4.21    |
| L superior frontal gyrus                |                         | -19 | 57  | 27  | 3.09    |
| R mid-cingulate gyrus                   | 5165                    | 5   | -11 | 33  | 4.55    |
| L middle temporal gyrus                 | 4178                    | -65 | -27 | 1   | 4.28    |
| R anterior temporal                     | 3488                    |     |     |     |         |
| R middle temporal gyrus                 |                         | 56  | -17 | -10 | 4.03    |
| R hippocampus                           |                         | 29  | -9  | -12 | 3.90    |
| R frontal                               | 3104                    |     |     |     |         |
| R middle frontal gyrus                  |                         | 22  | 22  | 29  | 4.53    |
| R middle frontal gyrus                  |                         | 33  | 45  | 26  | 3.56    |
| L medial temporal pole                  | 1859                    | -38 | 10  | -12 | 4.27    |
| R lateral occipital                     | 1487                    | 38  | -64 | 3   | 3.36    |
| L parahippocampal gyrus                 | 818                     | -15 | -15 | -18 | 4.09    |
| R inferior temporal gyrus               | 810                     | 55  | -31 | -29 | 4.17    |
| <b>Low &gt; High Frequency Words</b>    |                         |     |     |     |         |
| None                                    |                         |     |     |     |         |
| <b>High &gt; Low Imageability Words</b> |                         |     |     |     |         |
| L frontal                               | 6364                    |     |     |     |         |
| L middle frontal gyrus                  |                         | -21 | 42  | 13  | 4.10    |
| L middle frontal gyrus                  |                         | -36 | 12  | 36  | 3.85    |

| Location of extreme point               | Cluster size ( $\mu$ l) | X   | Y   | Z  | z-score |
|-----------------------------------------|-------------------------|-----|-----|----|---------|
| R middle frontal gyrus                  | 6079                    | 25  | 29  | 27 | 4.87    |
| R parietal                              | 3300                    |     |     |    |         |
| R supramarginal gyrus                   |                         | 59  | -45 | 33 | 4.38    |
| R intraparietal sulcus                  |                         | 32  | -44 | 48 | 3.50    |
| L supramarginal gyrus                   | 1791                    | -57 | -51 | 38 | 3.56    |
| R insula                                | 1374                    | 44  | 3   | 8  | 4.28    |
| R superior temporal gyrus               | 947                     | 66  | -9  | -3 | 3.60    |
| <b>Low &gt; High Imageability Words</b> |                         |     |     |    |         |
| None                                    |                         |     |     |    |         |
